# Supplementary material for: Cyclotetrahalo-p-phenylenes: simulations of halogen substituted cycloparaphenylenes and their interaction with C60
Source: Royal Society of Chemistry journal article supplement (doi:10.1039/c6cp03376h), 2016-01-01
Supplement: c6cp03376h1.pdf [file c6cp03376h1.pdf]

## SUPPLEMENTARY MATERIALS

### Cyclotetrahalo-p-phenylenes: Simulations of halogen substituted cycloparaphenylenes and their interaction with C<sub>60</sub>

J. Rio,<sup>a</sup> D. Erbahar<sup>b,a</sup>, M. Rayson,<sup>c</sup> P. Briddon,<sup>a,b</sup> and C. P. Ewels<sup>a,\*</sup>

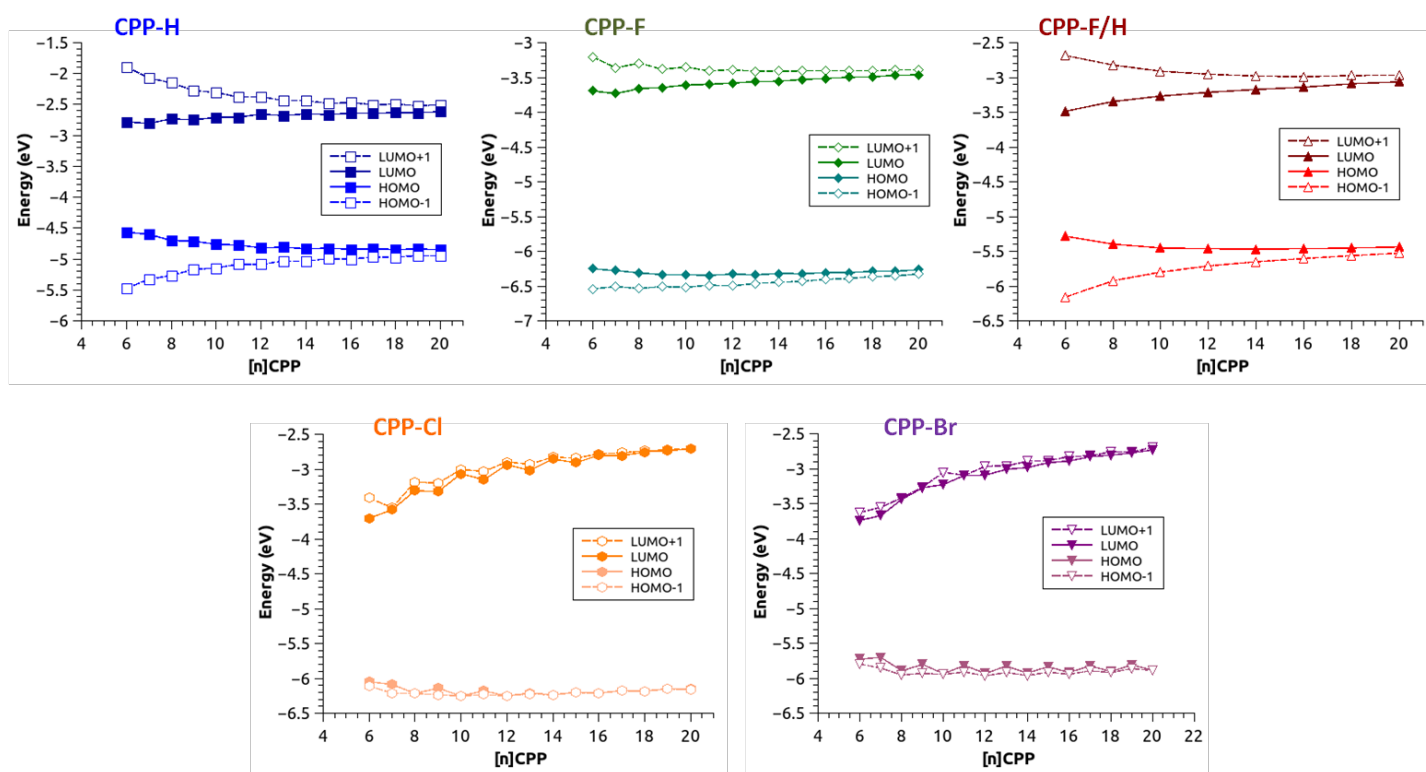

**Supplementary Figure 1:** Variation in calculated energy of HOMO-1, HOMO, LUMO and LUMO+1 values (eV) with ring size  $n$  for the different functionalised  $[n]$ CPP species

| [10]CPP-X | HOMO-1                                                                             | HOMO                                                                               | LUMO                                                                                | LUMO+1                                                                               |
|-----------|------------------------------------------------------------------------------------|------------------------------------------------------------------------------------|-------------------------------------------------------------------------------------|--------------------------------------------------------------------------------------|
| H         |   |   |   |   |
| F         |   |   |   |   |
| F/H       |   |   |   |   |
| Br        |  |  |  |  |

**Supplementary Figure 2** Visualization of HOMO-1, HOMO, LUMO and LUMO+1 surface of [10]CPP-X (X=H, F, F/H, Br).
